# Supplementary material
Source: Elsevier journal article supplement (https://comptes-rendus.academie-sciences.fr/chimie/article/10.1016/j.crci.2009.10.010/file/attach/mmc1.pdf)
Supplement: mmc1 [file mmc1.pdf]

## Supplementary Information

**Table 1.** Selected bond lengths and bond angles in **4** (for atoms numbering see Fig. 1) obtained from the crystallographic data and from the DFT B3LYP/6-31G\*\* calculations.

| bonds    | Å        | DFT   | angles     | °        | DFT   |
|----------|----------|-------|------------|----------|-------|
| O1-C16   | 1.218(3) | 1.223 | N1-C1-C2   | 122.3(3) | 121.8 |
| C16-C8   | 1.479(3) | 1.493 | N1-C1-C6   | 120.9(3) | 121.3 |
| O2-C9    | 1.213(3) | 1.228 | O1-C16-C15 | 125.6(2) | 126.0 |
| C8-C7    | 1.351(4) | 1.369 | O1-C16-C8  | 126.2(2) | 127.2 |
| C8-C9    | 1.488(4) | 1.482 | C7-C8-C9   | 134.3(2) | 133.8 |
| C15-C10  | 1.387(3) | 1.399 | C8-C7-C4   | 135.8(3) | 134.6 |
| C15-C14  | 1.375(4) | 1.391 | C1-N1-C17  | 120.7(2) | 120.5 |
| C12-C13  | 1.385(5) | 1.404 | C1-N1-C26  | 120.9(2) | 121.0 |
| N1-C26   | 1.455(4) | 1.459 | C17-N1-C26 | 118.3(2) | 118.6 |
| N1-C17   | 1.449(4) | 1.463 | O2-C9-C10  | 125.0(3) | 123.7 |
| C1-N1    | 1.363(3) | 1.379 | C8-C9-C10  | 106.4(2) | 106.2 |
| C7-C4    | 1.422(3) | 1.436 | N1-C26-C25 | 115.1(3) | 115.0 |
| O6-C25   | 1.412(3) | 1.414 | O6-C25-C26 | 109.6(3) | 108.4 |
| O6-C24   | 1.412(5) | 1.416 | N1-C17-C18 | 112.3(3) | 114.5 |
| O4-C21   | 1.391(7) | 1.416 |            |          |       |
| O4-C20A  | 1.511(9) |       |            |          |       |
| O4-C20B  | 1.43(1)  | 1.421 |            |          |       |
| C19-C20A | 1.34(1)  |       |            |          |       |
| C19-C20B | 1.38(1)  | 1.528 |            |          |       |
